# Supplementary material
Source: publisher figshare collection journal article supplement (https://frontiersin.figshare.com/ndownloader/files/20024861)

## Supplementary Material 1

**Supplementary Figure 1.** Greenfinch population trends in the Netherlands. a: Breeding (resident) greenfinch population. b: Winter (migrating) greenfinch population. 1990 is chosen as reference year (index 100). Source: Dutch National Ecological Monitoring Scheme, Sovon Dutch Centre for Field Ornithology

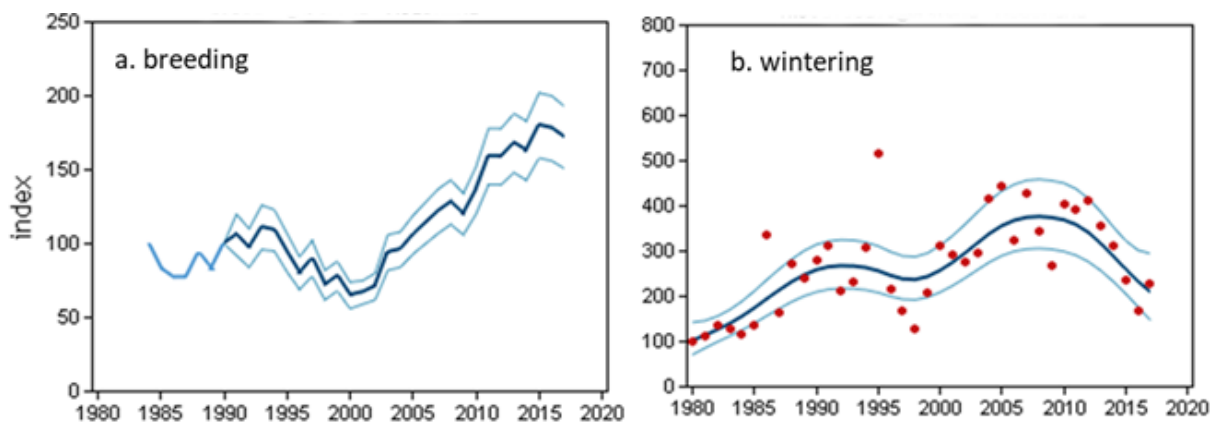

Supplement: Supplementary file [file 20024861]
